# Supplementary material for: Facile synthesis of hydroxypropyl chitosan-egg white hydrogel dressing with antibacterial and antioxidative activities for accelerating the healing of burn wounds
Source: Royal Society of Chemistry journal article supplement (doi:10.1039/d3tb00210a), 2023-01-01
Supplement: d3tb00210a1.pdf [file d3tb00210a1.pdf]

## Supporting Information

### Facile synthesis of hydroxypropyl chitosan-egg white hydrogel dressing with antibacterial and antioxidative activities for accelerating burn wound healing

*Ying Zhao*<sup>1</sup>, *Yulan Zhao*<sup>2</sup>, *Yuguo Chu*<sup>3</sup>, *Qiang Chang*<sup>1,#</sup>

<sup>1</sup>Department of Plastic and Reconstruction Surgery, Nanfang Hospital, Southern Medical University, Guangzhou 510515, China

<sup>2</sup>Department of Nephropathy Rheumatology, Zhijin people's hospital, Zhijin, 552100, China

<sup>3</sup>Clinical Trial Institution of Pharmaceuticals, Sun Yat-sen Memorial Hospital, SunYat-sen University, Guangzhou, 510120, China

#Corresponding author

**Table S1 RT-PCR primer sequences of GAPDH, TNF- $\alpha$ , IL-1 $\beta$ , IL-1 $\alpha$ , IL-4**

| Primer        |         | Sequence (5'-3')         | Species |
|---------------|---------|--------------------------|---------|
| TNF- $\alpha$ | FORWARD | CAGAAAGCATGATCCGCGAC     | Mice    |
|               | REVERSE | TTGAGAAGATGATCTGAGTGTGAG |         |
| IL-1 $\beta$  | FORWARD | ATGGGCTGGACTGTTTCTAATG   | Mice    |
|               | REVERSE | CTTGTGACCCTGAGCGACC      |         |

|               |         |                          |      |
|---------------|---------|--------------------------|------|
| GAPDH         | FORWARD | GGTTGTCTCCTGCGACTTCA     | Mice |
|               | REVERSE | TGGTCCAGGGTTTCTTACTCC    |      |
| TNF- $\alpha$ | FORWARD | CCAGGTTCTCTTCAAGGGACAA   | Rats |
|               | REVERSE | GGTATGAAATGGCAAATCGGCT   |      |
| IL-1 $\alpha$ | FORWARD | GCTAAGTTTCAATCAGCCCTTTAC | Rats |
|               | REVERSE | CATGATGAACTCCTGCTTGACG   |      |
| IL-1 $\beta$  | FORWARD | TGTTTCCCTCCCTGCCTCTGAC   | Rats |
|               | REVERSE | CGACAATGCTGCCTCGTGACC    |      |
| IL-4          | FORWARD | AGAAGCTGCACCGTGAATGAGT   | Rats |
|               | REVERSE | GTATTTCCCTCGTAGGATGCTTT  |      |
| GAPDH         | FORWARD | CTGGAGAAACCTGCCAAGTATG   | Rats |
|               | REVERSE | GGTGGAAGAATGGGAGTTGCT    |      |

Figure S1

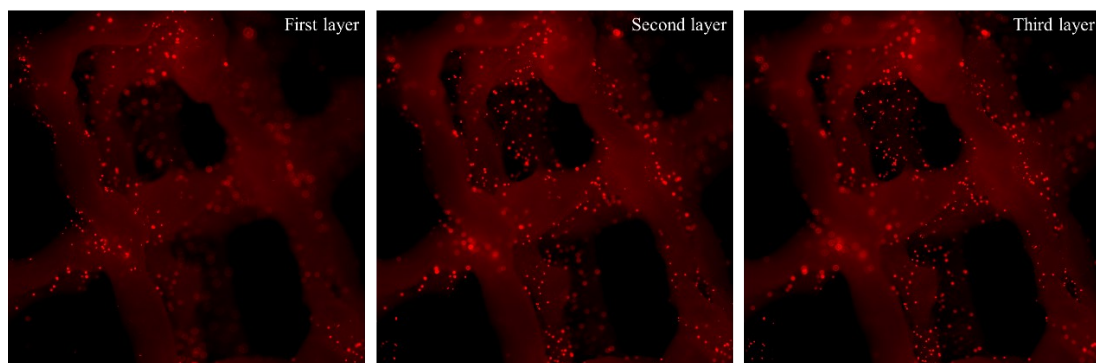

Figure S1. The cells adhered to different layers of HPCS-EWH scaffold to achieve directional growth in longitudinal space.

Figure S2

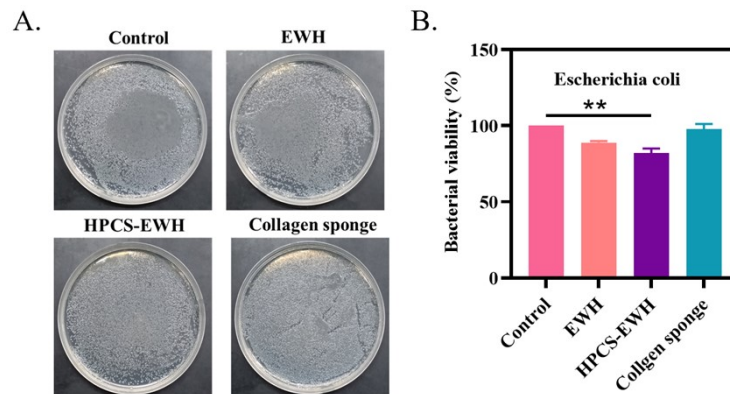

Figure S2. The anti-*Escherichia coli* property. A. Optical photographs of survival bacteria (*Escherichia coli*). B. The quantitative statistics of survival bacteria (*Escherichia coli*).

Figure S3

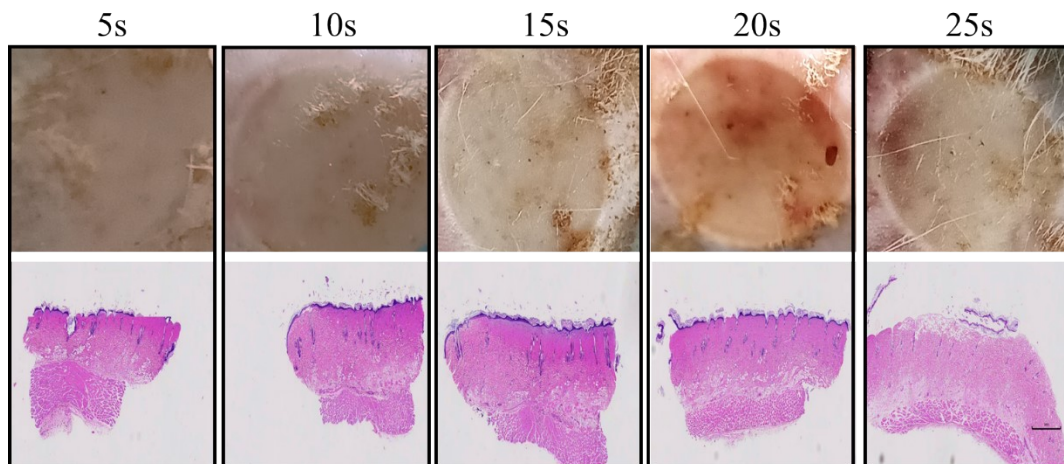

Figure S3. General observation and H&E staining of different burnt wound tissues (4X, Scale bar=1mm). 5s and 10s of burn time presented various degrees of superficial partial thickness burns, which affected the epidermis and superficial dermis. 15s of burn time, where thermal damages extended into the underlying deeper dermis, were classed as deep partial thickness burns. When burning time reached to 20s, burn damages extended through the full dermis, even to deeper tissues. 25s of the burn time, the skin structure collapsed by thermal injury.
